# Supplementary material for: Synthesis of hierarchical ZSM-12 nanolayers for levulinic acid esterification with ethanol to ethyl levulinate
Source: Royal Society of Chemistry journal article supplement (doi:10.1039/c9ra03213d), 2019-01-01
Supplement: c9ra03213d1.pdf [file c9ra03213d1.pdf]

## Supplementary Information

### Synthesis of hierarchical ZSM-12 nanolayers for levulinic acid esterification with ethanol to ethyl levulinate

Pannida Dugkhuntod, Thidarat Imyen\*, Wannaruedee Wannapakdee, Thittaya Yutthalekha, Saros Salakhum, Chularat Wattanakit

*Department of Chemical and Biomolecular Engineering, School of Energy Science and Engineering, and Nanocatalysts and Nanomaterials for Sustainable Energy and Environment Research Network of NANOTEC, Vidyasirimedhi Institute of Science and Technology, Rayong 21210, Thailand*

\*Corresponding author: Email ; thidarat.i@hotmail.com

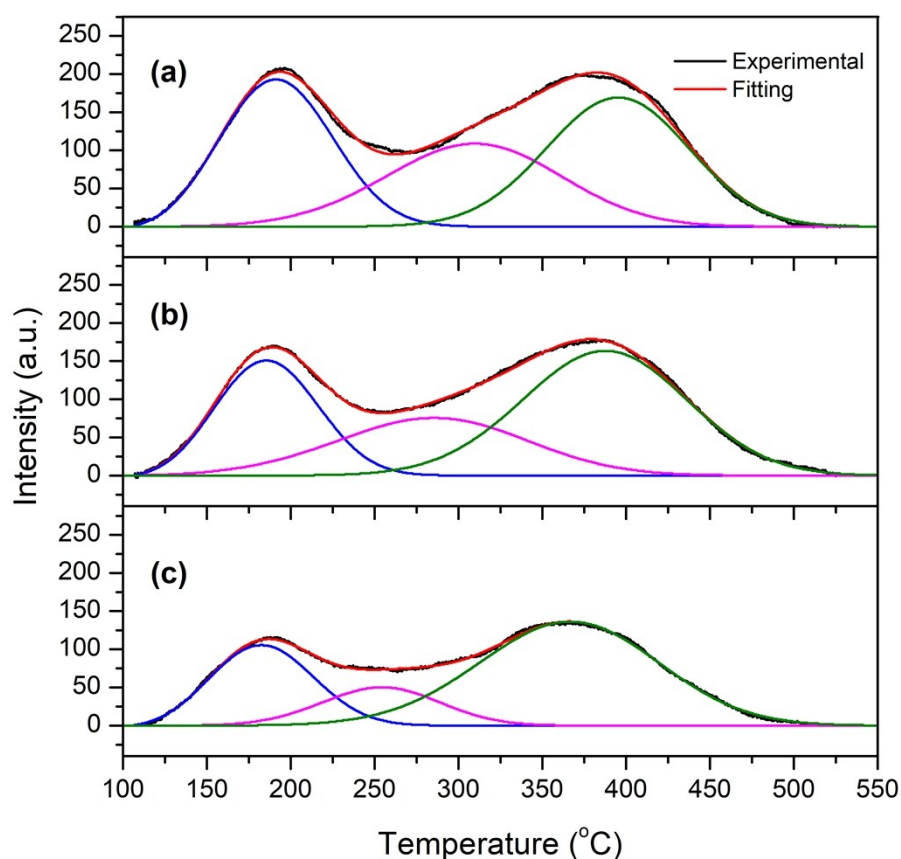

**Figure S1.**  $\text{NH}_3$ -TPD profiles and their deconvolution of ZSM-12 zeolites synthesized with different TPOAC/ $\text{SiO}_2$  molar ratios: (a) ZSM-12-0, (b) ZSM-12-0.03, and (c) ZSM-12-0.09.

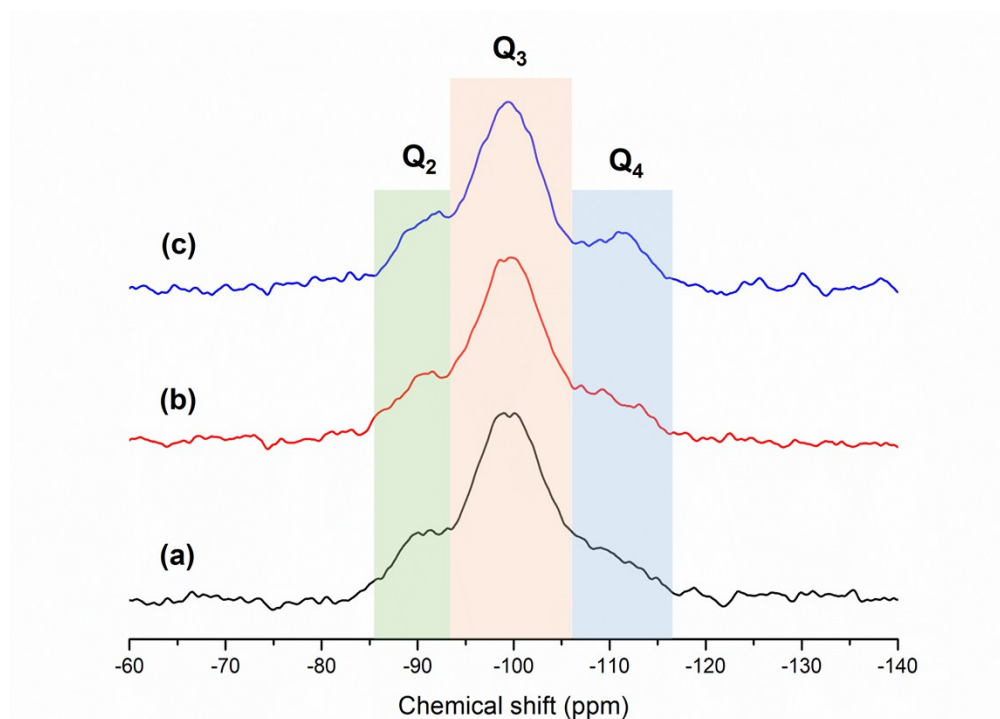

**Figure S2.**  $^{29}\text{Si}$ -NMR spectra of synthesized ZSM-12 zeolites obtained at different crystallization times: (a) 2 h, (b) 12 h, and (c) 24 h.

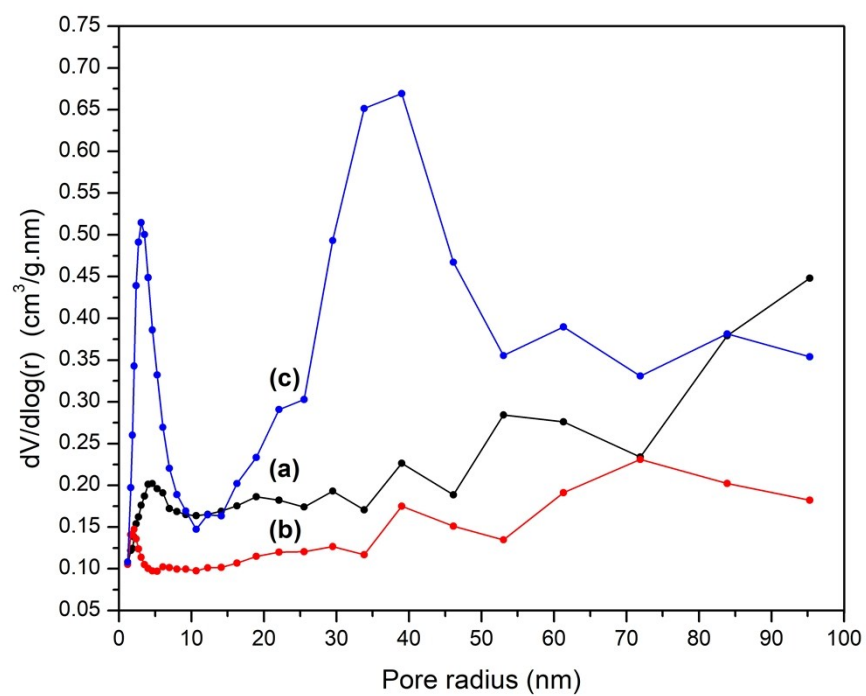

**Figure S3.** BJH pore size distribution (PSD) derived from the adsorption branch of isotherm of ZSM-12 zeolites synthesized with different TPOAC/SiO<sub>2</sub> molar ratios: (a) ZSM-12-0, (b) ZSM-12-0.03, and (c) ZSM-12-0.09.

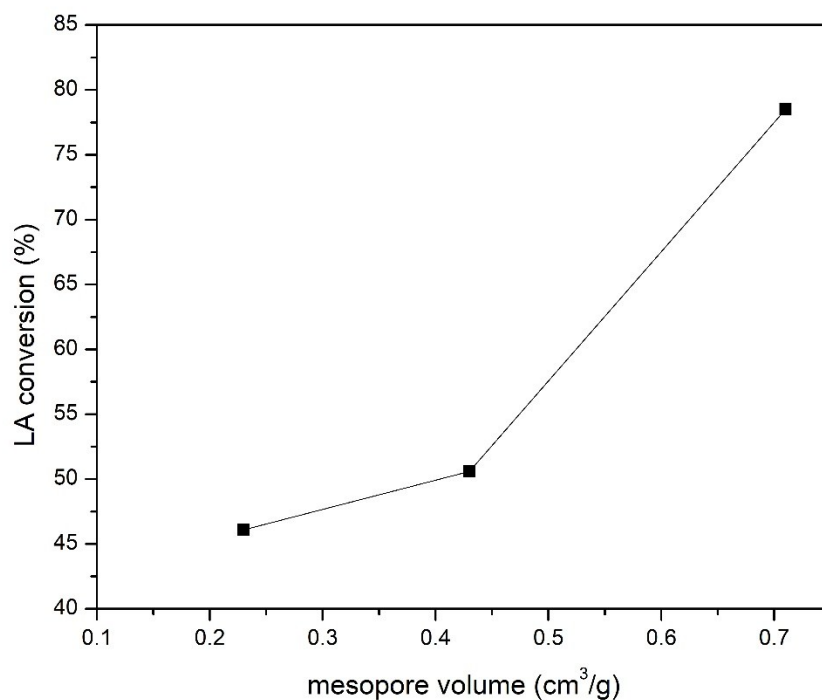

**Figure S4.** Levulinic acid conversion (%) as a function of mesopore volume of ZSM-12 zeolite.

**Table S1.** Acetic acid conversion and ethyl acetate selectivity obtained on different catalysts after 24 h of reaction (reaction conditions: T = 100 °C, acetic acid:ethanol molar ratio of 1:1, catalyst loading of 0.3 g)

| Sample      | Time (h) | Acetic acid    | Ethyl acetate   |
|-------------|----------|----------------|-----------------|
|             |          | conversion (%) | selectivity (%) |
| ZSM-12-0    | 24       | 79.9           | 99.8            |
| ZSM-12-0.09 | 24       | 85.5           | 97.6            |

**Table S2.** NH<sub>3</sub>-TPD data and the acid amount of different zeolites.

| Sample          | T <sub>peak</sub> (°C) |         |         | Acid amount (mmol/g) |                |                |               |
|-----------------|------------------------|---------|---------|----------------------|----------------|----------------|---------------|
|                 | LT peak                | MT peak | HT peak | Weak acidity         | Medium acidity | Strong acidity | Total acidity |
| ZSM-12-0.09     | 182.7                  | 254.2   | 366.6   | 0.041                | 0.022          | 0.098          | 0.161         |
| ZSM-5 nanosheet | 189.6                  | 297.8   | 385.0   | 0.064                | 0.030          | 0.072          | 0.166         |
| FAU nanosheet   | 201.5                  | -       | 412     | 0.159                | -              | 0.553          | 0.712         |

**Table S3.** Textural properties different hierarchical zeolites.

| Sample                       | S <sub>BET</sub> <sup>a</sup> | S <sub>micro</sub> <sup>b</sup> | S <sub>ext</sub> <sup>c</sup> | V <sub>total</sub> <sup>d</sup> | V <sub>micro</sub> <sup>e</sup> | V <sub>ext</sub> <sup>f</sup> | V <sub>ext</sub> /V <sub>total</sub> <sup>g</sup> |
|------------------------------|-------------------------------|---------------------------------|-------------------------------|---------------------------------|---------------------------------|-------------------------------|---------------------------------------------------|
| ZSM-12-0.09                  | 421                           | 143                             | 278                           | 0.75                            | 0.04                            | 0.71                          | 0.95                                              |
| ZSM-5 nanosheet <sup>1</sup> | 542                           | 296                             | 246                           | 0.86                            | 0.12                            | 0.74                          | 0.86                                              |
| FAU nanosheet <sup>2</sup>   | 699                           | 540                             | 159                           | 0.46                            | 0.21                            | 0.25                          | 0.54                                              |

<sup>a</sup> S<sub>BET</sub>: BET specific surface area.<sup>b</sup> S<sub>micro</sub>: microporous surface area.<sup>c</sup> S<sub>ext</sub>: external surface area.<sup>d</sup> V<sub>total</sub>: total pore volume.<sup>e</sup> V<sub>micro</sub>: micropore volume.<sup>f</sup> V<sub>ext</sub> = V<sub>total</sub> – V<sub>micro</sub>; All surface areas and pore volumes are in the units of m<sup>2</sup>/g and cm<sup>3</sup>/g, respectively.<sup>g</sup> fraction of mesopore volume.

## References

1. W. Wannapakdee, C. Wattanakit, V. Paluka, T. Yutthalekha and J. Limtrakul, *RSC Adv.*, 2016, **6**, 2875–2881.
2. T. Yutthalekha, C. Wattanakit, C. Warakulwit, W. Wannapakdee, K. Rodponthukwaji, T. Witoon and J. Limtrakul, *J. Clean. Prod.*, 2017, **142**, 1244–1251.
